1 **Ingestive behaviour of grazing ruminants: meta-analysis of the components**  
2 **linking bite mass to daily intake**

3 M. Boval<sup>1,a</sup>, D.Sauvant<sup>1a</sup>

4

5 <sup>1</sup> UMR Modélisation Systémique Appliquée aux Ruminants, INRA, AgroParisTech,  
6 Université Paris-Saclay, 75005, Paris, France

7

8 <sup>a</sup> AgroParisTech, 16 rue Claude Bernard, 75005, Paris

9

10 Corresponding author: Maryline Boval. Email:

11 [Maryline.boval@agroparistech.fr](mailto:Maryline.boval@agroparistech.fr)

12

13 Short title: Ingestive behaviour of grazing ruminants meta-analysis

14

15 **Abstract**

16 This meta-analysis shed light on the quantitative adaptive responses of feeding  
17 behaviour of Cattle (C) and Small Ruminants (SR), facing variations of sward  
18 characteristics, notably of sward height (SH,  $18.7 \pm 13.9$  cm) and herbage bulk density  
19 (HBD,  $1.73 \pm 1.30$  kg DM / m<sup>3</sup>). All responses expressed a plateau stressing an  
20 adaptive limit with extreme values of SH and HBD. The minimum plateau of BR ( $46.9$   
21  $\pm 14.6$  min<sup>-1</sup>) is around 40 min<sup>-1</sup>, while IR values (different for C and SR , respectively  
22  $69.1 \pm 38.1$  vs.  $99.9 \pm 45.7$  g/min/kg BW) ranged between a minimum and maximum  
23 plateau around 50 and 100 g/min/kg BW. Two other pasture management factors affect  
24 IR, namely forage allowance ( $10.16 \pm 6.0$ , DM % BW) and daily proportion of time  
25 spent grazing ( $0.30 \pm 0.08$ ). The results obtained confirm the specifically key role of

26 BM ( $1.80 \pm 127$  mg DM/kg BW) on IR. The regressions are  $IR=145 (1-\exp(-b \text{ BM}))$ , b  
27 being equal respectively for C and SR and C to 0.44 vs. 0.54. This literature review  
28 has also revealed fundamental differences in behaviour between C and SR although  
29 no study to date has attempted to compare them simultaneously. SR have to chew  
30 more ( $2.7 \pm 1.2$  vs.  $1.6 \pm 0.5$  JM/bite) to ingest the same amount of DM per bite than  
31 C, expressed in relation to BW, which allow them to ingest slightly quickly.

32

33 **Keywords (5):** Intake rate, Bite Rate, Sward height, Herbage bulk density

34

### 35 **Implications**

36 This article, following the previous one of Boval and Sauvant (2019), proposes a  
37 quantitative appraisal of the ingestive behaviour of grazing ruminants, based on  
38 studies published over 40 years, as well as well robust average values and  
39 relationships, considering inter- and intra-study effects and animal species  
40 specificities. This knowledge should contribute to a better overall understanding of the  
41 behavioural adaptation of ruminants at pasture, to the identification of key threshold  
42 values and appropriate parameters of interest to be considered, and to improve the  
43 efficiency and sensitivity of automatic devices, which are booming in the context of  
44 precision livestock farming at pasture.

45

### 46 **Introduction**

47 Knowledge of ingestive behaviour (IB) is determinant to better understand the  
48 strategies of animals for feeding in order to improve their management, whatever the  
49 feeding context. Ingestive behaviour determines the nutrient supply to ruminants and  
50 thus has a significant impact on performance and feed efficiency, which are essential

51 for increasing the profitability of livestock (Llonch *et al.*, 2018; Shalloo *et al.*, 2018).  
52 Moreover, a ruminant's robustness partly comes from its ability to adapt IB to the  
53 diversity of resources to be grazed. In addition, chewing behaviour provides  
54 information about digestive comfort and indicators of appetite, gut health and welfare.  
55 Numerous studies have focused on the IB of grazing ruminants. However, beyond the  
56 problems linked with the diversity of the methodologies applied, the items measured  
57 are very heterogeneous across publications. Likely for this reason, no synthetic  
58 statistical interpretation of published IB data for ruminant grazing has been carried out  
59 and published so far. However, there is a need to better understand the various  
60 aspects of animal IB, as it is now becoming possible to measure some of them in field  
61 conditions thanks to advances in electronic/computer technologies (Anderson *et al.*,  
62 2014; Fogarty *et al.*, 2018). Indeed, animal behaviour documented by tools employed  
63 in precision livestock farming, such as sensors, video cameras, accelerometers or  
64 pedometers, should greatly help in designing efficient management strategies for  
65 livestock production systems (di Virgilio *et al.*, 2018). A recent meta-analysis focused  
66 on bite mass (BM) and its main determining factors linked to major animal and sward  
67 characteristics (Boval and Sauvant, 2019). In this current paper, we will analyse the  
68 components affecting BM which are determining for intake rate and daily dry matter  
69 intake. Some studies differentiate between jaw movements due to harvesting forage  
70 and those processing the forage before swallowing. We have therefore attempted to  
71 better understand the function of these different types of jaw movements.

72

## 73 **Material and methods**

### 74 *Literature review and dataset construction*

75 This meta-analysis was carried out by considering published studies measuring  
76 components of the feeding behaviour of ruminants (cattle, sheep or goats) at pasture  
77 in various production systems (milk or meat) and various climatic contexts. The search  
78 for the literature was carried out using Web of Science, Science Direct, EDP Sciences  
79 and Cambridge Journals and using the reference lists cited by some reviews on the  
80 subject.

81 For each publication, we have integrated experiments and treatments for which there  
82 were documented values of at least one of the following criteria: BM, biting rate (BR),  
83 intake rate (IR), grazing and ruminating times (GT and RT, respectively, min/day) and  
84 data related to dry matter intake (DMI) and BW gain. In some publications, total jaw  
85 movements and chews were also measured, and therefore were included.

86

### 87 *Intermediary calculations*

88 For all the characteristics, we have harmonized the units within the whole dataset.  
89 Afterwards some components were also expressed per kg of BW, such as IR, in order  
90 to analyse the whole dataset including the maximum degrees of freedom (with data  
91 coming from different species and types of domestic ruminants). Considering the BM  
92 calculation, Boval and Sauvant (2019) have shown that BM can be divided by the BW<sup>1</sup>.  
93 When it was possible, the number of chews was calculated, considering that jaw  
94 movements (JM) = chews + bites (Galli *et al.*, 2017; Mulvenna *et al.*, 2018). When JM  
95 are expressed per bite, the number of JM/bite cannot be lower than 1 (i.e. one bite).  
96 For each publication retained in the database, the following information was recorded:  
97 the animal characteristics (breed, sex, age) as well as the forage characteristics

98 (species, herbage mass, surface sward height and herbage bulk density,  
99 morphological and chemical composition, etc.). Information related to the experimental  
100 conditions (at pasture or in other environments) and to the methods used to measure  
101 feeding behaviour and forage characteristics was also recorded. The season (dry or  
102 rainy), latitude and longitude have been précised as well for each experiment intra-  
103 publication, by using Köppen–Geiger classification (Peel *et al.*, 2007).

104

#### 105 *Treatment encoding*

106 Beyond specific codes assigned to each publication and to each experiment, additional  
107 codes were applied to identify specifically the factors of variation tested in the papers:  
108 the forage species, sward height, herbage bulk density or herbage allowance and the  
109 animal species. All of these codes were specific to the factors of variation studied in  
110 the publication; therefore, not all rows have values in the corresponding columns. For  
111 some experiments, in addition to the intra-experimental factors, some key criteria  
112 varied significantly, although they were not the factors tested intra-experiment. In this  
113 case, another code was added to specify these criteria, as a secondary factor of  
114 variation. For example, we identified experiments for which the intra-experiment sward  
115 height varied largely despite not being announced as a factor in the publications, but  
116 which can then be considered as a factor of variation for 62% of papers instead of the  
117 32% we had identified at first approach.

118 The final database included 98 publications (npub), 269 experiments (nexp) and 905  
119 treatments (n). The list of the references used to build the database is presented in the  
120 Annex.

121

122 *Statistical analysis*

123 Statistical analysis of the data was performed by meta-analysis according to the  
124 recommendations of Sauvant *et al.* (2008). In particular, inter- and intra-experiment  
125 variations were split to study in the intra-experiment relationships between variables  
126 considered two by two, and successively through the various factors of variations. The  
127 numbers of data different from one variable to another explain why the interpretation  
128 must be achieved considering the variables 2 by 2.

129

130 **Results**

131 *Statistical parameters of the ingestive behaviour components*

132 The statistics of the components of feeding behaviour were calculated for cattle and  
133 small ruminants (Table 1) and according to BW when it allowed pooling of data for both  
134 species. Among the data collected in the papers analysed, BR was one of the most  
135 documented components, as well as its reverse, namely the time spent per bite. These  
136 two components have a log-normal distribution and do not differ significantly between  
137 species.

138 Jaw movements associated with bites were registered in only about 20% of cases, but  
139 with sufficient data for each species.

140 Intake rate was less much documented in the papers than BR, and distribution of the  
141 data is quite close to a Gaussian law. Otherwise, IR is largely different between cattle  
142 and small ruminants, contrary to BR (Table 1). Even when IR was expressed per kg of  
143 BW, the difference between species remained but the value in this case was a little  
144 higher for small ruminants (Table 1).

145

146 *Modelling factors of variation of the ingestive behaviour components*

147 *Bite rate*

148 The influence of sward height (SH) on BR was evaluated from experiments that studied  
149 SH impacts. There is a negative curvilinear relation (Figure 1a) between BR (bites/min)  
150 and SH ( $18.7 \pm 13.9$  cm). Under a threshold of SH of 15–20 cm, there appears to be  
151 an acceleration of BR. The intra-experimental regression is:

152

153  **$BR = 41.4 + 29.9 \exp(-0.100 \times SH)$**  (n = 189; n<sub>exp</sub> = 63; RMSE = 5.8) [1]

154

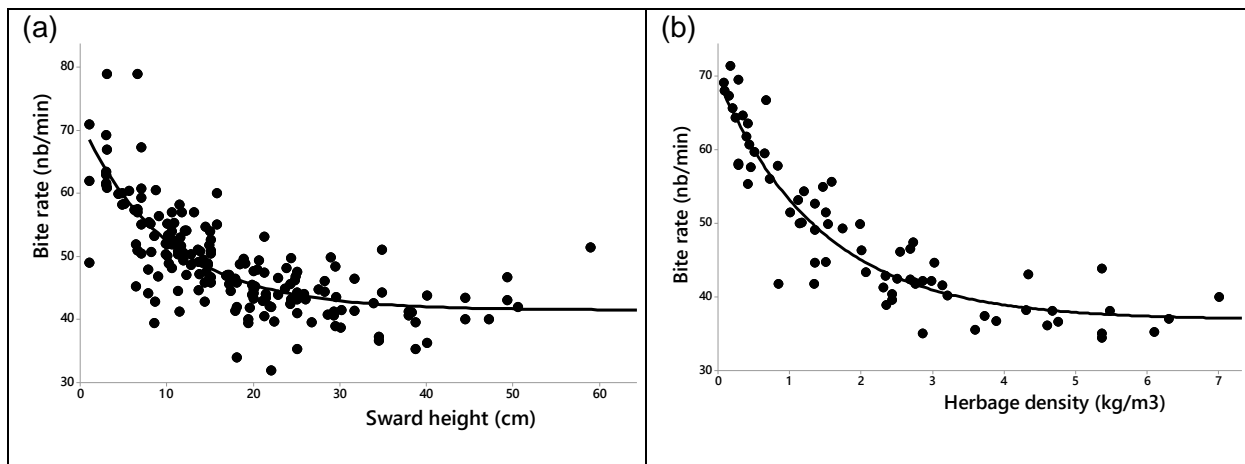

155 **Figure 1** Intra-experiment relationships between bite rate and sward height (a) or  
156 herbage bulk density (b).

157

158 The impact of apparent forage density (HBD,  $1.73 \pm 1.30$  kg DM/m<sup>3</sup>) on BR was  
159 assessed from experiments that tested the impacts of HBD variations. There is a  
160 negative exponential intra-experiment relationship between BR (bites/min) and HBD  
161 (Figure 1b); the regression is:

162

163  **$BR = 36.84 + 32.55 \exp(-0.692 \text{ HBD})$**  (n = 72; n<sub>exp</sub> = 25; RMSE = 3.9) [2]

164

165 An acceleration of BR occurs when the HBD decreases below a threshold between  
166 2 and 3 kg DM/m<sup>3</sup>. The regression in Equation 2 is a little more accurate than Equation  
167 1 (RMSE = 3.9 vs 5.8).

168

169 *Intake rate*

170 *Impact of SH.* When considering the experiments dealing with SH variations, there is  
171 a positive curvilinear intra-experiment effect of SH on IR (mg DM/kg BW/min), with an  
172 asymptotic value around 100 mg DMI/min/kg BW and a rapid decline in IR under a  
173 threshold SH of about 15–20 cm (Figure 2a). The intra-experiment relationship  
174 between both variables is:

175

176 
$$\text{IR} = 100.1 (1 - \exp(-0.093 \text{ SH})) \quad (n = 195; n_{\text{exp}} = 62; \text{RMSE} = 16.7) \quad [3]$$

177

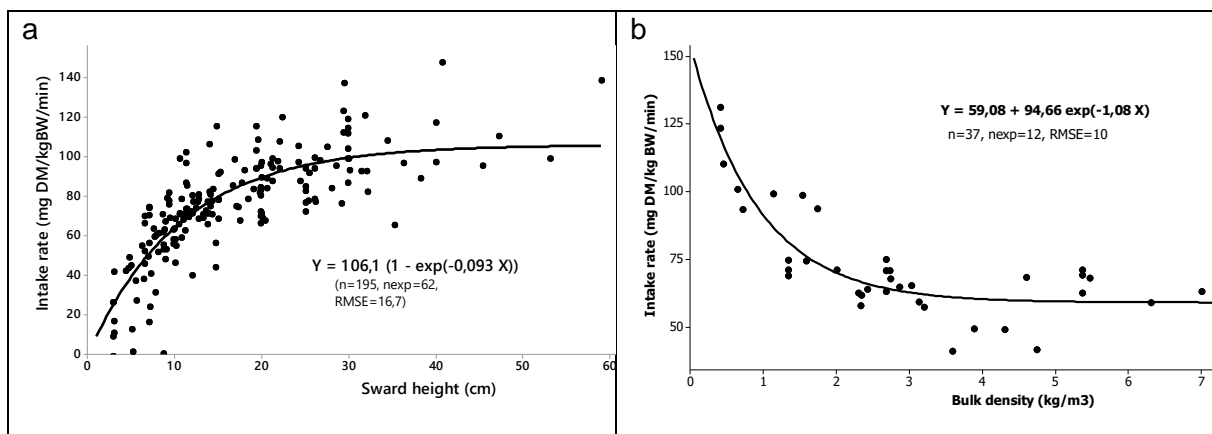

178 **Figure 2** Impacts of sward height (cm) (a) and herbage bulk density on intake rate (mg  
179 DM/kg BW/min) (b).

180

181 It appears that for three publications (Black and Kenney, 1984; Mezzalira *et al.*, 2014  
182 and 2017) and nine experiments, the response of IR to SH is clearly curvilinear,  
183 exhibiting a maximum value of IR followed by a decreasing IR with increasing SH



184 (Figure S1). In these papers, the maximum values of IR ranged between about 115 and  
185 160 mg DM/kg BW while the corresponding values of SH ranged between about 10  
186 and 30 cm.

187

188 *Impact of HBD.* As seen for BR (Figure 2b), there is an increase of IR when HBD is  
189 lower than a threshold of 2–3 kg DM/m<sup>3</sup>. The intra-experiment regression is:

190

$$191 \quad \mathbf{IR = 59.08 + 94.66 \exp(-1.08 \text{ HBD})} \quad (n = 37; n_{\text{exp}} = 12; \text{RMSE} = 10) \quad [4]$$

192

193 *Interaction between SH and HBD.* As mentioned, Equations 3 and 4 were calculated  
194 on datasets issued from experiments that considered variations in SH and HBD,  
195 respectively, as experimental factors. As the number of data with SH and HBD is fairly  
196 high, another approach was performed to study, within publications, the effect of  
197 interactions between SH and HBD on IR (mg DM/kg BW/min). An intra-publication  
198 significant quadratic regression was calculated:

199

$$200 \quad \mathbf{IR = (3.74) + 3.336 \times SH - 0.01279 \times SH^2 + 25.4 \times HBD - 1.816 \times HBD^2 - 0.842 \times}$$
$$201 \quad \mathbf{SH \times HBD}$$

$$202 \quad (n = 227; n_{\text{pub}} = 30; \text{RMSE} = 21.1) \quad [5]$$

203

204 The three quadratic terms of this regression are highly significant, stressing the  
205 interaction between SH and HBD. Figure 3 shows the trace of this regression and  
206 illustrates the interaction with SH on the X-axis and HBD corresponding to the  
207 successive lines of iso-HBD. The thickness of the lines is proportional to the frequency  
208 of the observed situations. The interaction appears concretely in Figure 3: when SH <

209 about 20 cm, its negative influence on IR is compensated by an increase of HBD.  
210 Beyond the threshold value of HBD around 2–3 kg DM/m<sup>3</sup>, the influence of SH almost  
211 disappears. Otherwise in Figure 3, it can be seen that HBD has no effect on IR when  
212 SH is around 1–20 cm. Over this threshold of SH around 15–20 cm, the influence of  
213 HBD tends to be negative on IR which is then impacted mainly by the variations of SH.

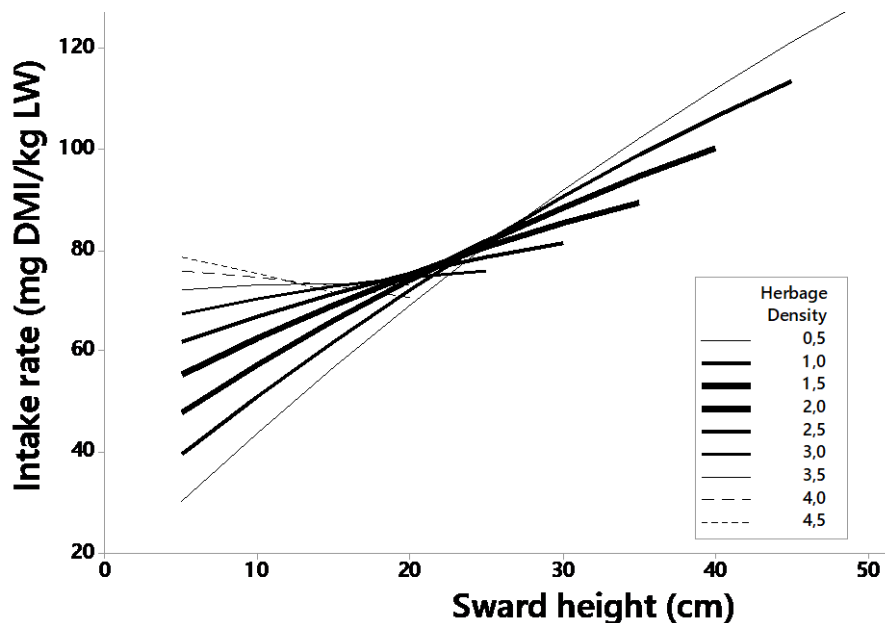

214  
215 **Figure 3** Interactions between sward height (cm) and herbage bulk density (kg DM/m<sup>3</sup>)  
216 on intake rate (mg DM/kg BW/min).

217  
218 *Influence of stem and leaf mass.*

219 The stem mass (SM = 1.41 ± 0.80), when leaves are available, determines IR (Figure  
220 S2) according the following intra-experiment regression:

221  
222 
$$IR = 2.92 + 73.60 (1 - \exp(-2.44 SM)) \quad (n = 56; n_{exp} = 17; RMSE = 19.1) \quad [6]$$

223  
224 The leaf mass (LM; 1.17 ± 0.74 t DM/ha) also affects IR according to the following  
225 equation:

226

$$227 \quad \mathbf{IR = 111.46 (1 - \exp (-1.64 LM))} \quad (n = 73; n_{exp} = 19; RMS = 14.3) \quad [7]$$

228

229 Figure S2 presents the two regressions and illustrates the fact that LM explains a large  
230 range of IR, from 0 to 111 mg DM/kg BW/min, while for SM, the equivalent range is  
231 only 48 mg DM/kg BW/min. For the lower values of SM, there is a great variability of  
232 IR, which is only due to the impact of leaf growth. Thus, it was decided to remove these  
233 low values of SM. Figure S2 shows also that the plateau is achieved for SM beyond  
234 the threshold of about 1 t DM/ha, illustrating that the continued growth of stems does  
235 not affect IR. In contrast, leaf growth goes on impacting IR, without any precise  
236 threshold of LM/ha.

237

#### 238 *Impacts of grazing management factors.*

239 The effect of herbage allowance (HA) on IR was analysed for experiments excluding  
240 continuous grazing. It appears that IR decreased when HA increased, until a minimum  
241 plateau close to 40 mg/kg BW/min (Figure 4a). When HA decreased under a value of  
242 around 10% BW, IR increased rapidly until values close to 100 g/kg BW/min. The  
243 values under 10% of BW come partly from experiments where the access time was  
244 only 1 h or even less (Figure 4a). This response of IR is mainly due to the increase of  
245 BM.

246

$$247 \quad \mathbf{IR = 41.55 + 153.8 \exp (-0.317 HA)} \quad (n = 73; n_{exp} = 25; RMSE = 7.1) \quad [8]$$

248

249 Another major factor of grazing management is the access time. In the database, only  
250 10 experiments were focused on this aspect. The response of IR is negatively related  
251 to the daily proportion of time spend grazing (pGT,  $0.30 \pm 0.08$ , Figure 4b):

252

$$253 \quad \mathbf{IR = 35.83 + 107.28 \exp(-4.56 \text{ pGT})} \quad (n = 28; n_{\text{exp}} = 10; \text{RMSE} = 6.1) \quad [9]$$

254

255 For the same dataset, there was a trend of reducing the level of DMI/BW when pGT  
256 decreased:  $-1.36 \pm 0.81$  g DMI/kg BW ( $P = 0.11$ ) per 0.1 decrease of pGT. For a part  
257 of this dataset (three experiments and nine treatments), the BM was measured and it  
258 increased significantly when pGT decreased ( $-7.1 \pm 1.3$  g DM/kg BW per unit of pGT).

259 In contrast, BR was not influenced by pGT in this dataset.

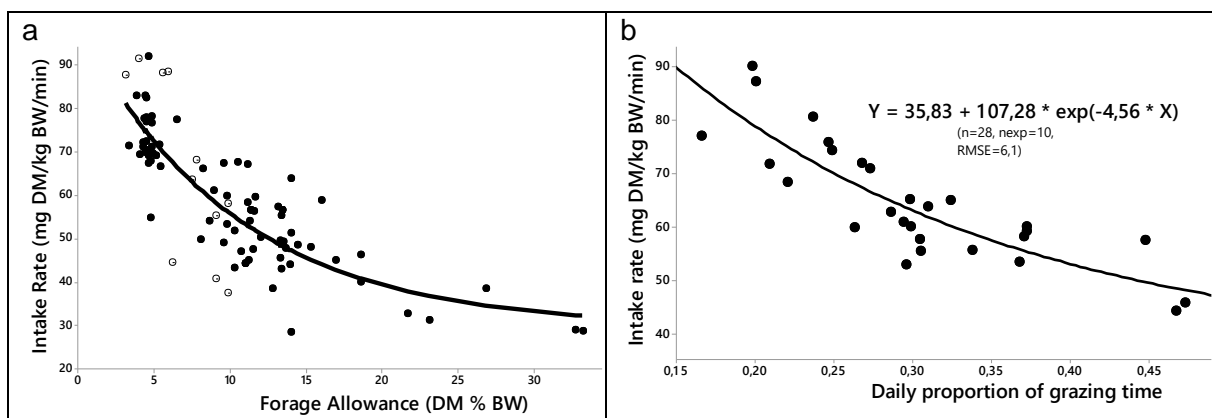

260 **Figure 4** Effect of forage allowance (a) and proportion of time spent grazing (b) on  
261 intake rate (mg DM/kg BW/min).

262

### 263 *Grazing time*

264 When GT is not limited, there is a negative relationship between SH and GT (Figure  
265 S3), and the intra-experiment regression between the two parameters is:

266

$$267 \quad \mathbf{GT = 431.5 + 301 \exp(-0.083 \text{ SH})} \quad (n = 86; n_{\text{exp}} = 26; \text{RMSE} = 46) \quad [10]$$

268

269 The number of data is not sufficient to study the influence of HBD on GT, or on  
270 rumination and idling times.

271

272 *Interrelations across components*

273 *Global correlations*

274 Considering inter-experiment relationships (Table 2), the most inter-related  
275 components are on one hand between BM and IR and the number of chews/bite  
276 ( $r = 0.75$ ) and on the other hand, to a lesser extent, between GT and DMI ( $r = 0.328$ ).

277 Considering the intra-relationships (Table 2), there are two pairs of variables correlated  
278 with each other, independently of BM, on the one hand inter and intra negative relations  
279 between BR and chews/bite and on the other hand positive inter and intra relationships  
280 between IR and DMI.

281

282 *Influence of animal species on the relationships*

283 Whatever the type of experience, there is a negative relationship between BR and BM  
284 (Figure 5). For cattle, the intra-experiment regression is:

285

286  **$BR = 12.0 + 46.2 \exp(-0.198 BM)$**  (n = 342; n<sub>exp</sub> = 109; RMSE = 4.6) [11a]

287

288 For small ruminants, it is:

289

290  **$BR = 12.0 + 54.0 \exp(-0.172 BM)$**  (n = 73; n<sub>exp</sub> = 22; RMSE = 4.2) [11b]

291

292 It appears that the asymptote of 12.0 that is never achieved is not different between  
293 the two species, while the intercept is significantly higher for small ruminants compared  
294 to cattle (66.0 vs 58.2 bites/min).

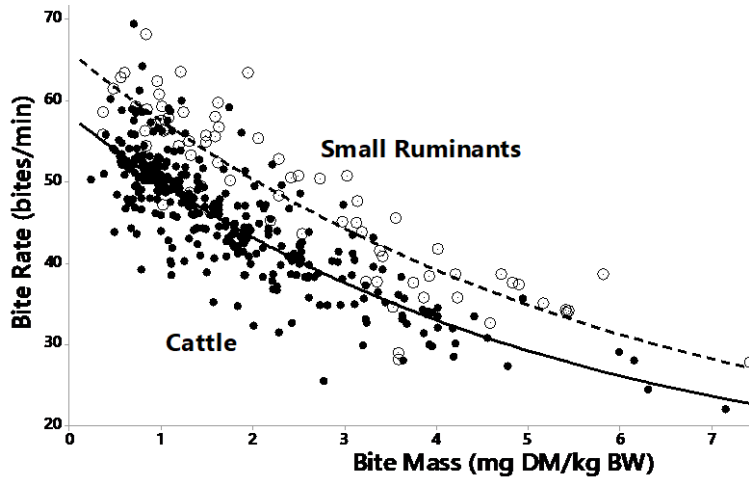

295  
296 **Figure 5** Intra-experiment relationship between bite rate (bites/min) and bite mass  
297 (mg/kg BW) for cattle (closed circles) and small ruminants (open circles).

298  
299 The JM and chewing associated with the bites are both positively related to BM (Table  
300 2). The relationship between JM/bite and BM is significantly different for small  
301 ruminants and cattle (Figure 6a). The intra-species and intra-experiment regression  
302 equation for cattle is:

303  
304 
$$\text{JM/bite} = 1.29 + 0.121 \text{ BM} \quad (n = 79; n_{\text{exp}} = 24; \text{RMSE} = 0.16) \quad [12a]$$

305  
306 For sheep and goats, the corresponding regression is less accurate, and the data  
307 number is lower:

308  
309 
$$\text{JM/bite} = 1.16 + 0.72 \text{ BM} \quad (n = 42; n_{\text{exp}} = 11; \text{RMSE} = 0.44) \quad [12b]$$

310

311 For these two equations, the intercept is not different to 1, illustrating that the number  
312 of chews is negligible for very small bites, and in this extreme situation JM are only  
313 bites. The data available on jaw and chewing movements also revealed different  
314 slopes of the BR-dependent decrease, for cattle and small ruminants, respectively  
315 (Figure 6b). For cattle, the intra-experiment regression is:

316

317 
$$\text{JM/bite} = 1 + 1.94 \exp(-0.0283 \text{ BR}) \quad (n = 85; n_{\text{exp}} = 28; \text{RMSE} = 0.17) \quad [13a]$$

318

319 For sheep and goats, the corresponding regression is less accurate, and the data  
320 number is lower:

321

322 
$$\text{J/bite} = 1 + 12.38 \exp(-0.0428 \text{ BR}) \quad (n = 25; n_{\text{exp}} = 6; \text{RMSE} = 0.41) \quad [13b]$$

323

324 In Figure 6b, the number of JM/bite is the sum of bite + chews per bite. For instance,  
325 for a BR of 40/min, the number of JM is about 1.5 JM/bite for cattle, meaning that an  
326 animal makes a mean of half a chew/bite. In contrast, for sheep and goats, there are  
327 about 2 chews/bite when BR = 40.

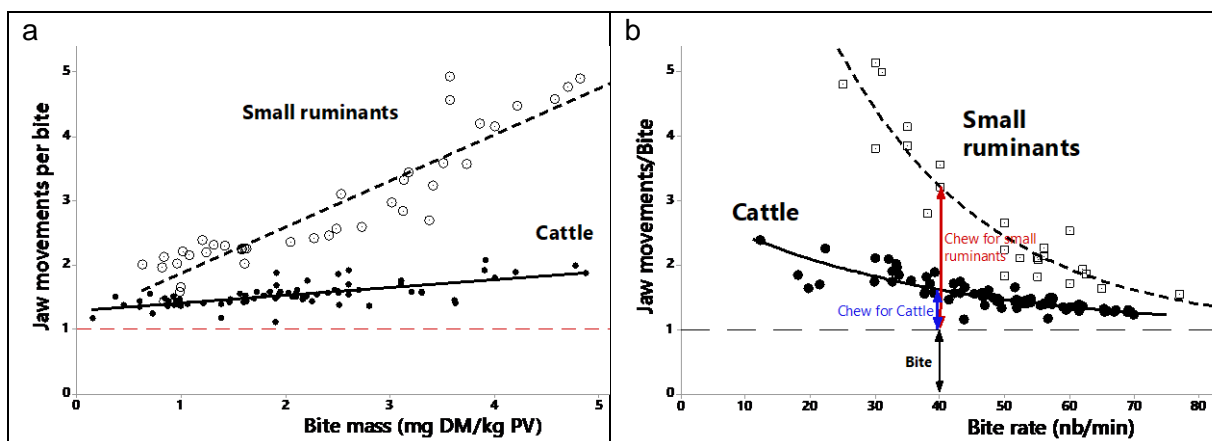

328 **Figure 6** Influences on jaw movements/bite of bite mass (a) and bite rate (b).

329

330 It appears clearly that for the same BM, the number of JM is much higher for small  
331 ruminants, with an order of magnitude of about 10 ( $3.1 \pm 28.5$  vs.  $3.3 \pm 3.6$ ).

332 The link between JM, expressed per gram of DMI, and BM was also analysed. For both  
333 species, the relationship is hyperbolic (Figure 7); the intra-experiment equation for  
334 cattle is:

335

$$336 \quad \mathbf{JM/g\ DMI = 258/(1 + 555.4\ BM)} \quad (n = 79; n_{exp} = 23; RMSE = 1.7) \quad [14a]$$

337

338 For small ruminants, the regression is less accurate:

339

$$340 \quad \mathbf{JM/g\ DMI = 45.8/(1 + 0.41\ BM)} \quad (n = 42; n_{exp} = 11; RMSE = 14.6) \quad [14b]$$

341

342 Figure 7 shows these two regressions; it appears clearly that for the same BM, the  
343 number of JM is much higher for sheep, with an order of magnitude of about 10 ( $31.1 \pm$   
344  $28.5$  vs  $3.3 \pm 3.6$  JM/g DMI). It must be stressed that for sheep, three high outlier values  
345 of 94 to 165 JM/g DMI for a very low BM ( $BM < 0.4$  mg/kg BW) from the same paper  
346 (Black and Kenney, 1984) have been removed. Moreover, we were also able to verify  
347 the decrease in JM with IR and significant differences that remain between small  
348 ruminants and cattle.



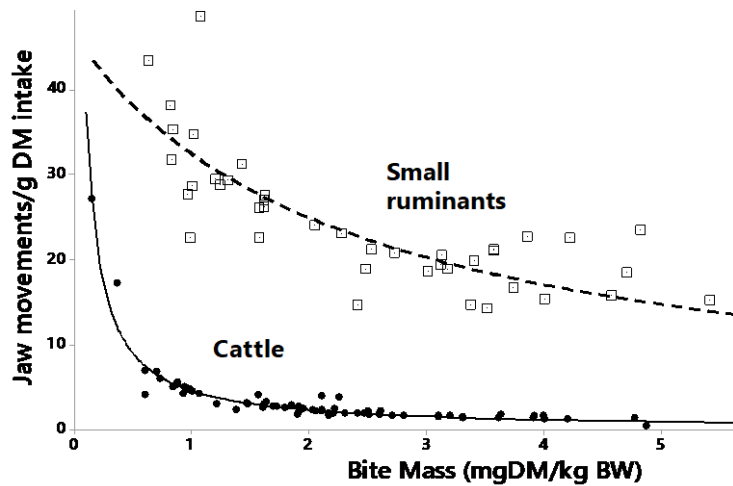

349

350 **Figure 7** Influence of bite mass (BM, mg DM/kg BW) and of species on the number of  
351 jaw movements per gram of DM.

352

353 As the JM/g DMI are linked to the process of particle comminution, the link between  
354 BM and rumination time was investigated from a limited set of data for cattle with  $0.5 <$   
355  $BM < 2.5$  mg DM/kg BW. It appears that the two components are positively related,  
356 according to the following intra-experiment regression:

357

358  **$RT \text{ (min/day)} = 366 (1 - \exp(-2.92 \text{ BM} - 0.22))$**

359  $(n = 49; n_{exp} = 19; RMSE = 26.1)$  [15]

360

361 This equation shows an asymptotic value of RT of 366 min/day, and RT drops markedly  
362 when BM decreases below a threshold of 1–1.5 mg DM/kg BW. It appears thus that  
363 there is a substitution in the comminution activities between intake and rumination.  
364 When the fill effect of forage in the mouth increases, the ruminant is less efficient in  
365 reducing the particle size so it must ruminate more to compensate.

366 The relationship between IR (mg DM/min/kg BW) and BM (mg DM/kg BW) is positive  
367 and curvilinear and, as BR was different between the two species (Figure 7), two  
368 separate fittings were performed. For cattle, the intra-experiment regression is:

369

$$370 \quad \mathbf{IR = 145.0 (1 - \exp(-0.440 BM))} \quad (n = 331; n_{exp} = 103; RMSE = 9.7) \quad [16a]$$

371

372 For small ruminants, it is:

373

$$374 \quad \mathbf{IR = 145.0 (1 - \exp(-0.543 BM))} \quad (n = 72; n_{exp} = 22; RMSE = 10.8) \quad [16b]$$

375

376 Figure 8 shows the two regressions; it appears that the differences are globally small  
377 and are at the advantage of small ruminants for lighter bites, consistent with what was  
378 observed for BR (Equations 11a and 11b and Figure 5). The asymptotic value of 145  
379 g DM/kg BW/min is the same between both species. The maximum difference between  
380 IR for the two species is observed for BM ~ 2.5 g/kg BW. It must be noted that in order  
381 to have a common regression, considering all the data, the power of BW must be 0.85.  
382 The curvilinearity of this relationship illustrates that BR, which is the ratio of IR to BM  
383 in Figure 5, decreases with the rise of BM as already remarked. Thus, BR is  
384 54 bites/min when BM is close to 0, to approximately 22–23 bites/min when BM is  
385 equal to 6 mg/kg BW. This relationship is mainly the outcome of influences of both SH  
386 and HBD on BM (Boval and Sauvant, 2019), and IR (Figure 2a and 2b).

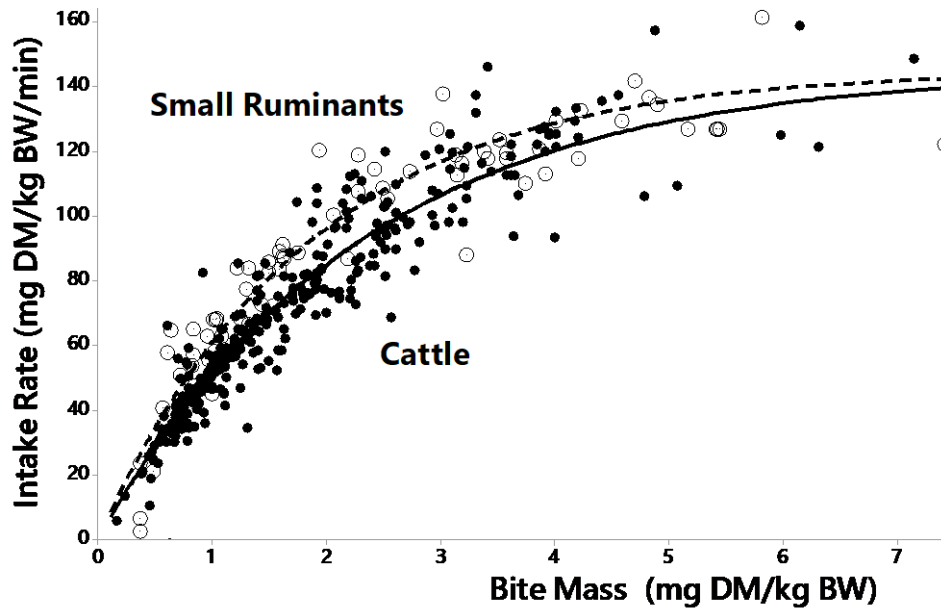

387

388 **Figure 8** Relationship between intake rate (mg/kg BW/min) and bite mass (mg/kg BW)  
389 for cattle (closed circles) and small ruminants (open circles).

390

391  $\text{DMI (\%BW)} = 1.36 + 0.026 \text{ IR}$  (n = 139; nexp = 52; RMSE = 0.30) [17]

392

393 The relationship is still significant when only the 40 experiments focused on the impact  
394 of SH are considered. But, in this case the slope is higher i.e. 0.037 (n = 37; nexp =  
395 14; RMSE = 0.13).

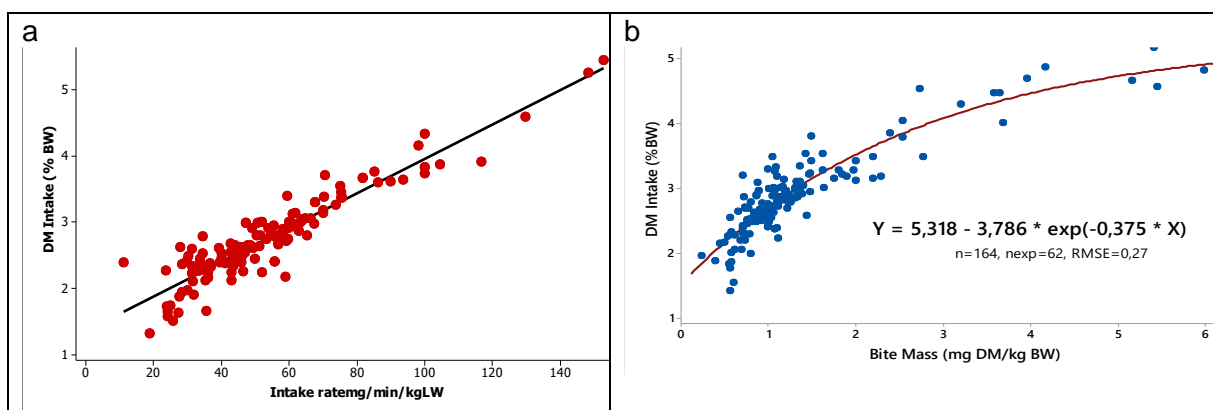

396 **Figure 9** Relationships between daily DM intake (%BW) and intake rate (a) and  
397 between bite mass and dry matter intake (b).

398

399 There is a positive and curvilinear relationship between BM and daily DMI when  
400 treatments with an observation time longer than 1 h are pooled.

401

$$402 \quad \text{DMI (\%BW)} = 5.318 - 3.786 \exp(-0.375 \text{ BM})$$

$$403 \quad (n = 164; n_{\text{exp}} = 62; \text{RMSE} = 0.27) \quad [18]$$

404

405 Clearly, a high BM induces a saturated response of both IR (Figure 8) and daily DMI  
406 (Figure 9b) in grazing ruminants. However, the number of data determining the  
407 asymptote is low.

408

## 409 Discussion

### 410 *Features of the database*

411 The database made up of 98 publications shows how studies implying cattle  
412 predominate, while lines of the database related to small ruminants represent only 1/5  
413 of the total. The publications referenced in this database are spread over the last 40  
414 years, since 1978, with nearly 85% of publications over the last 20 years. The most  
415 studied factors of variation in the publications were SH (61 % of the treatments), then  
416 bulk density to a much lesser extent (14 % of the treatments). The other factors studied  
417 represent less treatments, and the corresponding IB components available were too  
418 scattered to allow a valuable interpretation.

419 Owing to the available data, this meta-analysis presents several limits such as the lack  
420 of specific consideration of the impact of some sward characteristics such as the ratio  
421 of leaves/stem and their tensile strength or the chemical composition of the sward on  
422 the behaviour components. Moreover, we did not consider the spatio-temporal  
423 behaviour characteristics of grazing ruminants (feeding stations, patches), nor the

424 kinetics of grazing behaviour during the nycthemeron. Therefore, the considerations  
425 done on the time budget are static.

426

427 *Impacts of canopy characteristics and of some management strategies*

428 Among the most conventional sward characteristics considered in the literature, SH  
429 and HBD mainly have been considered for their impact on BR, IR, GT and DMI. For  
430 the other sward characteristics, the IB components available were too scattered to  
431 allow a valuable interpretation. Despite the limited data available for other sward  
432 characteristics, the effects of herbage mass, LM and SM could have been studied, but  
433 only for IR. Moreover, some data were sufficient to be considered under the angle of  
434 management strategies, such as HA and access time.

435 Hence, by increasing SH, BR decreases to a minimum plateau value of about 40  
436 bites/min as soon as the height reaches 20–30 cm (Figure 1a). On the contrary, IR  
437 increased with SH, as was previously reported for BM (Boval and Sauvant, 2019), and  
438 reached very rapidly a maximum plateau of about 100 mg DM/kg BW/min beyond a  
439 height of 20–30 cm (Figure 2a). This maximum plateau results from the combination  
440 of the minimum value of BR with the maximum value of BM as proposed by Boval and  
441 Sauvant (2019). These trends of response of IR to SH have already been described in  
442 the specific contexts of several experiments (Penning, 1986; Ginane and Petit, 2005;  
443 Hirata *et al.*, 2010). Notably, Delagarde *et al.* (2011) presented a synthetic response  
444 of IR with a plateau value close to that of Figure 2a; however, the response was fitted  
445 by two linear segments, and presents an elbow that we did not observe at similar  
446 values of SH of 22–23 cm. Moreover, for very low values of SH, the decrease of IR  
447 was not sufficient compared to their observed data reported in the publication  
448 (Delagarde *et al.*, 2011), nor to our model. Otherwise, the average plateau calculated

449 in this meta-analysis (Figure 2a) did not include data of three publications (Black and  
450 Kenney, 1984; Mezzalira *et al.*, 2014 and 2017), where a decrease of IR was observed  
451 beyond SH values ranging from 10 to 30 cm (Figure S1). For these same studies, a  
452 similar tendency has already been observed for BM (Boval and Sauvant, 2019),  
453 suggesting that in certain situations of high SH, it would become more and more  
454 difficult to assemble forage into a bite. This consistent decline in IR and BM is thought  
455 to be due to the change in the structure of tall species described by some authors  
456 (Spallinger and Hobbs, 1992; Mezzalira *et al.*, 2014 and 2017).

457 Regarding the influence of HS on GT, it decreased to a minimum plateau value of  
458 about 450 min when SH values exceeded 20–30 cm; while for lower HS values, GT  
459 becomes higher and can exceed 650 min/day (Figure S3). This trend is consistent with  
460 previous reports by Alvarez *et al.* (2007) and Perez-Prieto *et al.* (2011).

461 By increasing the HBD, BR decreased until a plateau of around 40 bites/min beyond  
462 2–3 kg DM/m<sup>3</sup> (Figure 1b), similar to the minimum plateau observed with high SH  
463 (Figure 1a) in another set of experiments. We noted a similar trend with IR, which also  
464 decreased globally with HBD (Figure 2b) and plateaued at about 60 mg DM/kg  
465 BW/min, at the same HBD threshold of 2–3 kg DM/m<sup>3</sup>. These trends are globally  
466 opposite to what were previously observed for BM, which increases with both SH and  
467 HBD (Boval and Sauvant, 2019). Unfortunately, concerning GT, the effect of HBD  
468 could not be analysed as for SH, as most of the experiments that tested HBD variations  
469 were carried out with micro-swards, for which the duration of grazing could not be  
470 measured.

471 In fact, the effects of SH and HBD cannot be disconnected from one another in natural  
472 grazing conditions, and we were opportunely able to study in our database the  
473 interaction between these two major factors, on IR (Figure 3). Globally the effect of SH

474 is more marked than that of HBD. At low SH, HBD positively influences IR while for  
475 high SH, HBD presents a limited negative influence on IR (Figure 3). Only a few  
476 individual studies have measured this interaction between SH and HBD consistently to  
477 our results. It has been studied actually only for short grasses and with micro-swards,  
478 as by Laca *et al.* (1992) and Benvenuti *et al.* (2006).

479 Aside from SH and bulk density, other characteristics are also likely to influence IR,  
480 such as LM and SM. They both have a positive effect on IR; in particular, LM explains  
481 a larger range of IR, surely linked with leaf growth, without any threshold being  
482 observed. In contrast, when the SM increases beyond 1 t of DM/ha, the IR reaches a  
483 plateau of 100 mg MS/kg BW/min.

484 While our database was not mainly focused on the influence of management strategies  
485 on global responses such as DMI, some publications allowed highlighting of some IB  
486 responses. Thus, ruminants are able to increase their IR until values near to 100 mg  
487 DMI/kg BW/min when facing an important decrease of forage allowance (Figure 4a) or  
488 of grazing access time (Figure 4b). This adaptive behaviour mainly results from  
489 differences in BM (Boval and Sauvant, 2019) which appears as a key factor of animal  
490 robustness as it allows ruminants to maintain, or only slightly decrease, their level of  
491 DMI despite a decrease of available resource and access time. As BM is at least partly  
492 explained by individual factors (Sollenberger and Vanzant, 2011; Boval and Sauvant,  
493 2019), it appears useful to investigate further animals' ability to adapt to restricted  
494 resources and GT.

495

#### 496 *From BM to intake rate and daily intake*

497 Analysis of the impact of canopy characteristics on the various IB components  
498 highlights the behavioural adaptation by ruminants to achieve satisfying BM and IR.

499 That appears for the low values of SH (< 20–30 cm) and of HBD (< 2–3 kg DM/m<sup>3</sup>),  
500 resulting in an acceleration of BR (Figure 1a and 1b) to compensate for the smaller  
501 bites. Consequently, the resulting IR is actually increased at low HBD (Figure 2b), while  
502 that is not the case at low SH (Figure 2a) due to the first limiting effect of SH on BM  
503 (Boval and Sauvant, 2019). In addition, for low SH, the GT is longer (Figure S3), as  
504 another way to compensate for low values of BM and IR. However, we did not have  
505 enough data to show this lengthening of GT also with low values of HBD.

506 Beyond analysis of the effect of sward characteristics on IB components, the major  
507 relationships between these components provided further understanding. Thus, there  
508 is a strong negative correlation between BM and BR (Table 2); correlations between  
509 BM and chews/bite are also positive, while based on much less data (Table 2), and the  
510 correlation between BM and DMI is less marked, especially inter-experiment  
511 correlation. And most structuring regressions concern the link between BM and BR  
512 and the influence of BM on IR (Figure 8) which are useful for modelling purposes. All  
513 these correlations are consistent with previous reports (Poppi, 2011; Chilibroste *et al.*,  
514 2007 and 2015) and this meta-analysis, resulting from numerous data, provides robust  
515 average values of the main correlations.

516 The close negative relationship between BM and BR may be better understood by  
517 analysing JM/bite (Figure 6a) and how they increase with BM. Grazing animals perform  
518 JM, which contribute both to assembling the forage before harvesting and to chewing  
519 it in the mouth, before swallowing. Hence, larger bites require logically more processing  
520 before the next bite can be taken (Mulvenna *et al.*, 2018). Therefore, the time needed  
521 between two bites increases, representing the sum of the time devoted in the JM to  
522 biting and chewing. These additional activities mechanically slow down the frequency  
523 of bites (Figure 6b). According to Spallinger and Hobbs (1992), BR is indeed the



524 inverse of handling time (i.e. the time invested to bite and chew) and this occurs mainly  
525 in pastures, where potential bites are concentrated, corresponding mostly to a  
526 functional response of type 3, according to Mezzalana *et al.* (2017).

527 The analysis of JM expressed per gram of DM consumed (Figure 7) shows that the  
528 number of JM decreases when the bites become larger. This suggests that with larger  
529 bites of more than 1 mg/kg BW, particle fragmentation efficiency decreases (Sauvant  
530 *et al.*, 1996; Baumont *et al.*, 2000). This is consistent with our results showing how  
531 larger bites are positively correlated with longer rumination times (Figure S4, Equation  
532 15). With larger bites, the fill effect of the forage in the mouth increases and the grazer  
533 would be less efficient in reducing the particle size and so it must ruminate more to  
534 compensate. It appears then as a substitution in the comminution activities between  
535 intake and rumination. This could be due also partly to the fact that small BM is more  
536 often composed of more fibrous removed parts. Indeed, larger bites are more often  
537 associated with the presence of leaves in the sward canopy (Drescher *et al.*, 2006;  
538 Geremia *et al.*, 2018), whereas the more fibrous stems represent a physical resistance  
539 inducing a limit to biting. Geremia *et al.* (2018) reported how BM is small at the end of  
540 the grazing period, as animals are forced to harvest grass with a higher percentage of  
541 stems and dead material.

542 Clearly, BM is the major determinant of IR and contributes consequently to differences  
543 of DMI. Our dataset contains some large BM, more than 4 mg/kg BW, which allows  
544 very high values of IR to be achieved, up to 140 mg/kg BW (Figure 8), while the mean  
545 asymptotic values observed for factors were around 100 mg/kg BW (Figures 2–4).  
546 Several authors had already reported these positive relationships (ref), and our results  
547 provide few data for extreme situations (low SH and HBD), as 140 mg appears as a  
548 maximum rate achievable whatever the animal species. For these few high BM and IR

549 values, the corresponding DM intake may exceed 5% of BW, being also influenced by  
550 the total daily duration of grazing. However, contrary to the curvilinear relationship  
551 between BM and DMI (Figure 9b), the relationship between IR and DMI (Figure 9a)  
552 appears linear, and we could not highlight any threshold of DMI. These results could  
553 be due to the low number of DMI values corresponding to high values of IR that we  
554 collected.

555

### 556 *Animal species specificity*

557 From our database, we were able to calculate some specific relationships for cattle or  
558 small ruminants, being unable to distinguish between sheep and goats. However,  
559 according to Mulvena *et al.* (2018) and Laca (2010), there is no marked difference  
560 between these two species of small ruminants.

561 It appears that for the same level of BM, small ruminants graze with a faster BR  
562 compared to cattle, by about 10 bites/min (Figure 5). Besides that, small ruminants  
563 make more JM accompanying each bite compared to cattle (Figure 6b), and the  
564 difference increases clearly when BR decreases. For very small bites less than 1 mg/kg  
565 BW, there are almost no JM/bite (Figure 6a). For small ruminants, the number of chews  
566 increases very quickly, with BM of 5 mg/kg BW, requiring about 5 JM/bite (Figure 6a).  
567 Thus when JM are expressed per gram of DMI, the number of JM is approximately 10  
568 times higher for small ruminants compared with cattle (Figure 7). It is approximately  
569 the same scaling value when both species are compared in terms of DMI. In any case,  
570 small ruminants make many more JM to crop 1 g of DMI, likely investing more energy  
571 per gram of DMI than cattle, as already reported (Galli *et al.*, 2018). Aside from chews,  
572 another type of JM may explain the difference between species, i.e. the chew-bite that  
573 can be measured with some acoustic monitoring methods (Galli *et al.*, 2018). Indeed,

574 cattle (Ungar *et al.*, 2006) and sheep (Galli *et al.*, 2011) may use discrete JM to chew  
575 and bite, but also simultaneously chew and bite on the same jaw opening-closing cycle.  
576 However, in our database, we had no such values of chew-bites.  
577 Consequently, all of these differences imply that small ruminants have a faster IR, with  
578 a maximum equal to 1.2 times higher IR expressed per kg of BW, compared to cattle  
579 (Figure 8). Otherwise, Boval and Sauvant (2019) have also pointed out that, for the  
580 same SH, the bite depth/kg BW is higher for small ruminants, so it was necessary to  
581 use BW at power 0.20 to match the data of BD for both species. The difference of bite  
582 depth between the two species is extremely low compared to their respective BW,  
583 revealing that sheep chewing and biting modalities would be more effective for going  
584 deeper into the sward compared to cattle, as already suggested (Gordon *et al.*, 1996;  
585 Woodward, 1998; Baumont *et al.*, 2006). Indeed, it may be observed how sheep  
586 perform successive chews to go deeper into the canopy sward, by mobilizing their lips  
587 in quick movements.  
588 All these results are well consistent with the idea that bite and chew rates decrease  
589 commonly with ruminant species having greater BW and BM (Wilson and Kerley, 2003;  
590 Mulvenna *et al.*, 2018). Moreover, these results emphasize the different mechanisms  
591 implemented by small ruminants or cattle to adapt to the characteristics of the  
592 resource, with their anatomical specificities (Baumont *et al.*, 2006; Meier *et al.*, 2016).  
593 In the case of small ruminants, the most mobile lips participate in forage prehension  
594 and therefore consumption, with associated movements of the jaw that can be  
595 recorded. Cattle have a particularly long freely mobile tip (Meier *et al.*, 2016) that they  
596 use to greatly increase the diameter and surface of each bite to compensate for limited  
597 resources as with short SH (Boval and Sauvant, 2019). Although the relationships  
598 between the different behavioural variables are different for these two species, the fact

599 remains that the make-up of the bite for both species determines the rate of intake with  
600 very similar trends (Figure 9) and with a comparable maximum threshold around 140  
601 mg/kg BW).

602

### 603 **Conclusions**

604 This meta-analysis provided a set of empirical models that can serve (i) as benchmarks  
605 for future studies and models of ruminant feeding behavior and well-being (ii) to identify  
606 parameters of interest for animal management at pasture (iii) to reference values for  
607 automatic measurement devices.

608 Approximately 20 quantitative relationships were established within this meta-analysis,  
609 confirming that bite size is a pivotal part of the ingestive behavior of ruminants in  
610 pasture, as it is both sensitive to major sward characteristics and determining for intake  
611 rate, and daily intake.

612 The main response laws highlighted are valid for different domestic ruminants when  
613 expressed in relation to body weight. Nevertheless, important differences appeared  
614 between cattle and small ruminants, the latter having to chew more for the same bite  
615 mass. The literature review emphasizes the great variability of methods carried out to  
616 measure ingestive behavior components. Our database should be supplemented by  
617 data collected with animals in stalls to assess the generic relationships applying  
618 whatever the feeding context.

619

620 **Table 1** *Number and mean values, standard deviation, minimums and maximums of*  
 621 *the feeding behaviour components collected in the publications*

|                       | Mean ± SD    | Min–max    | n   | Normality <sup>1</sup> |
|-----------------------|--------------|------------|-----|------------------------|
| <b>BM</b>             | 1.80 ± 1.27  | 0.107–7.41 | 581 | N(L)                   |
| <b>(mg DM/BW)</b>     |              |            |     |                        |
| Small ruminants       | 0.11 ± 0.09  | 0.09–0.63  | 117 | N(L)                   |
| (g DM/B)              |              |            |     |                        |
| Cattle (g DM/B)       | 0.77 ± 0.65  | 0.05–4.00  | 458 | N(L)                   |
| <b>BR (bites/min)</b> | 46.9 ± 14.6  | 11.2–106.7 | 560 | N                      |
| <b>JM/bite</b>        |              |            |     |                        |
| Small ruminants       | 2.73 ± 1.22  | 1.0–6.5    | 45  | N                      |
| Cattle                | 1.60 ± 0.54  | 1.13–5.04  | 97  | N                      |
| <b>Chews/bite</b>     |              |            |     |                        |
| Small ruminants       | 1.79 ± 1.44  | 0.20–6.20  | 35  | N                      |
| Cattle                | 0.59 ± 0.52  | 0.12–3.36  | 92  | N                      |
| <b>IR (g DM/min)</b>  |              |            |     |                        |
| Small ruminants       | 4.34 ± 2.0   | 0.5–11.3   | 91  |                        |
| Cattle                | 27.6 ± 18.9  | 1.3–146.3  | 339 |                        |
| <b>IR</b>             |              | 2.70–274.1 | 415 | N(L)                   |
| <b>(mg/min/kg BW)</b> |              |            |     |                        |
| Small ruminants       | 99.94 ± 45.7 | 12.0–274.1 | 64  |                        |
| Cattle                | 69.1 ± 38.1  | 2.70–248.8 | 349 |                        |
| <b>Bite/g DMI</b>     |              |            |     |                        |
| Small ruminants       | 15.8 ± 17.7  | 1.6–105.0  | 85  | N(L)                   |
| Cattle                | 2.5 ± 2.1    | 0.3–21.0   | 316 | N(L)                   |
| <b>GT (min)</b>       | 519 ± 146    | 138–1080   | 293 |                        |
| <b>RT (min)</b>       | 366 ± 129    | 31–574     | 140 |                        |
| <b>IT (min)</b>       | 459 ± 190    | 86–955     | 149 |                        |
| <b>DMI (%BW)</b>      | 2.96 ± 1.10  | 0.45–8.0   | 248 |                        |

622 BM = bite mass; B = bite; BR = bite rate; JM = jaw movements; IR = intake rate; GT = grazing time; RT  
 623 = ruminating time; IT = idling time; DMI = dry matter intake.

624 <sup>1</sup> Normality of the distributions: N = non-normal; L suggests a log-normal asymmetric distribution.

625

626 **Table 2** Correlations between ingestive behaviour components implied in the DMI,  
 627 calculated inter- and intra-experiment (respectively the first and second value per  
 628 component)

|                              | BM                              | BR                              | Chews/bite                      | IR                  | GT                 |
|------------------------------|---------------------------------|---------------------------------|---------------------------------|---------------------|--------------------|
| <b>BR</b>                    | -0.503***<br>N = 170            |                                 |                                 |                     |                    |
|                              | -0.576***<br>N = 386            |                                 |                                 |                     |                    |
| <b>Chews/bite</b>            | 0.707***<br>N = 43              | -0.597***<br>N = 43             |                                 |                     |                    |
|                              | 0.760***<br>N = 100             | -0.701***<br>N = 100            |                                 |                     |                    |
| <b>IR<br/>(mg/min/kg BW)</b> | 0.703***<br>N = 134             | 0.165**<br>N = 134              | 0.100 <sup>ns</sup><br>N = 43   |                     |                    |
|                              | 0.778***<br>N = 313             | -0.244***<br>N = 313            | 0.497***<br>N = 100             |                     |                    |
| <b>GT (min/day)</b>          | -0.283**<br>N = 94              | -0.039 <sup>ns</sup><br>N = 94  | -0.463*<br>N = 43               | -0.188*<br>N = 94   |                    |
|                              | -0.117 <sup>ns</sup><br>N = 180 | -0.045 <sup>ns</sup><br>N = 180 | 0.160 <sup>ns</sup><br>N = 100  | -0.239**<br>N = 180 |                    |
| <b>DMI %BW</b>               | 0.243***<br>N = 86              | -0.040 <sup>ns</sup><br>N = 86  | 0.645***<br>N = 43              | 0.360***<br>N = 86  | 0.408***<br>N = 86 |
|                              | 0.648***<br>N = 153             | -0.254***<br>N = 153            | -0.378 <sup>ns</sup><br>N = 100 | 0.793***<br>N = 153 | 0.177*<br>N = 153  |

629 N = number of data; BM = bite mass; BR = bite rate; IR = intake rate; GT = grazing time.

630

631

632

633 **Supplementary material**

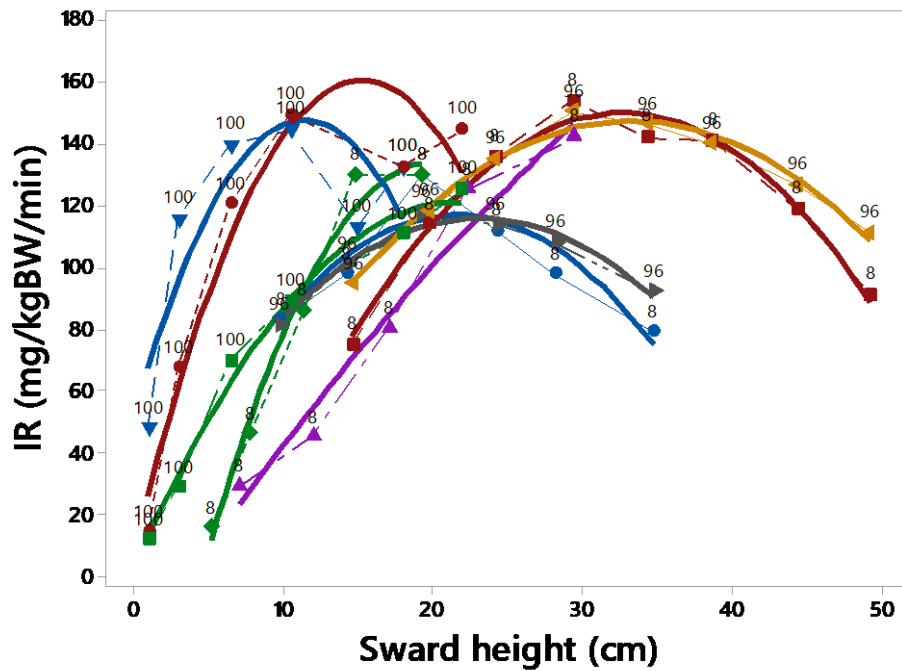

634

635 **Figure S1: Impact of sward height on Intake rate for some studies**

636

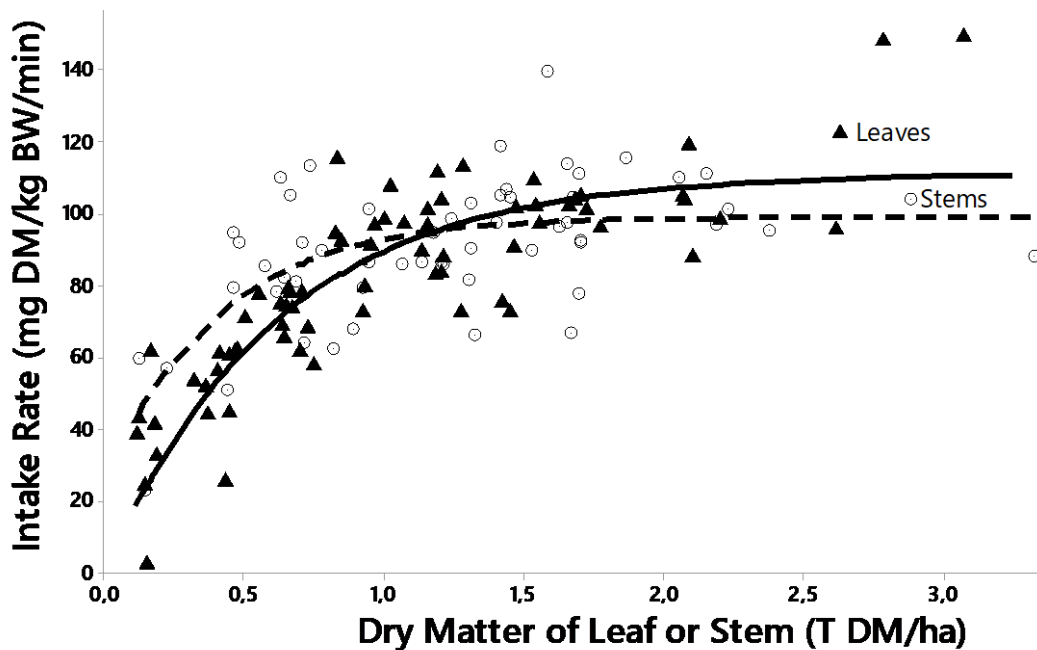

637

638 **Figure S2: Respective influences of DM of leaf and stem, on intake rate.**

639





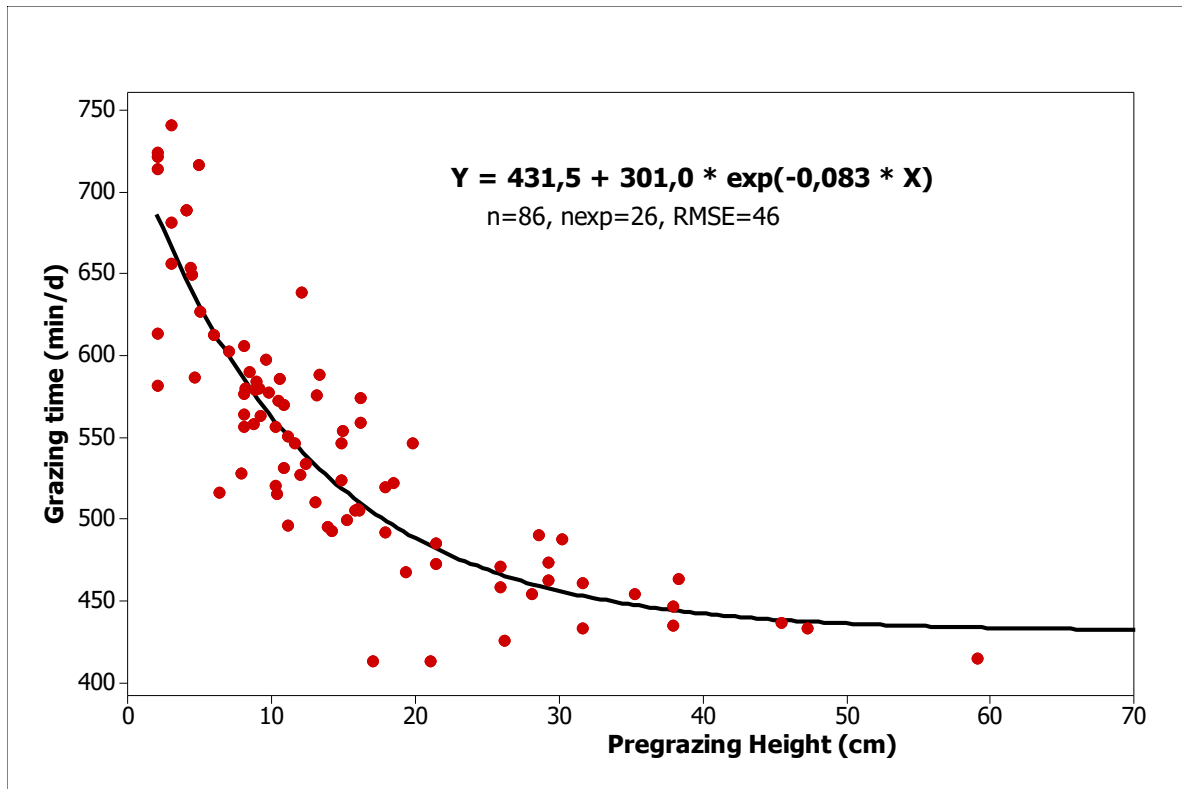

641

642

**Figure S3:** Effect of sward height (cm) on grazing time (min/day).

643

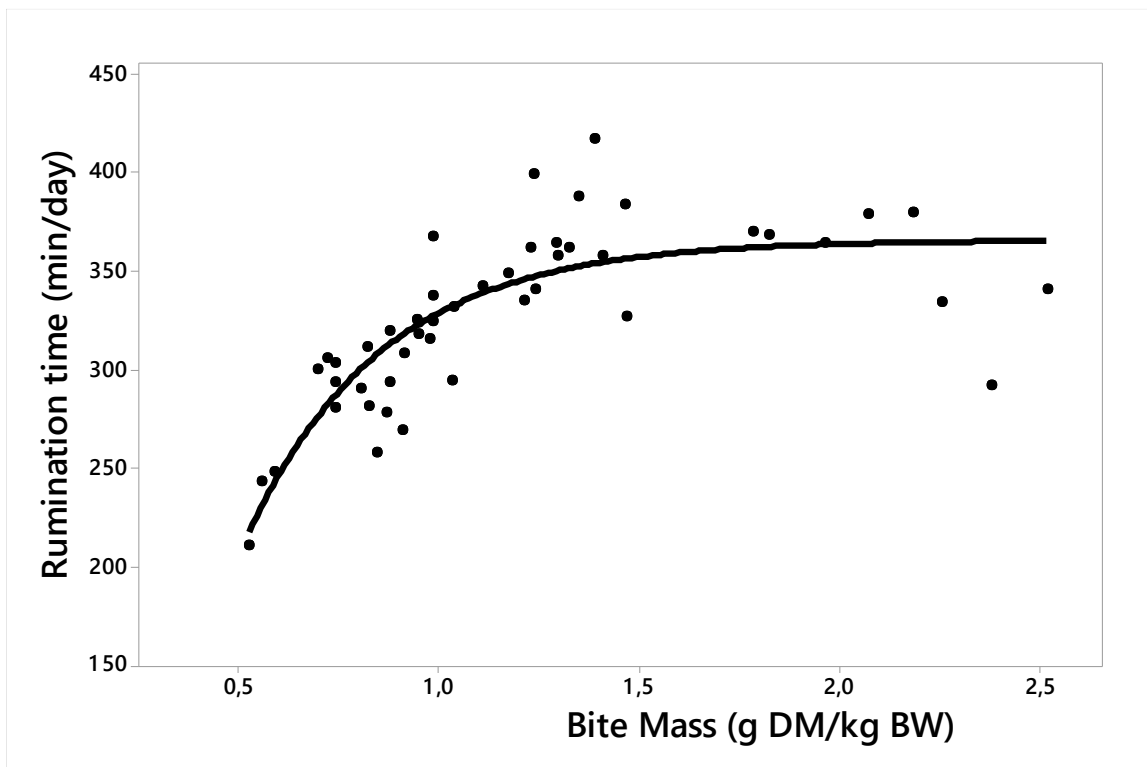

644

**Figure S4:** Relationship between rumination time (min/day) and Bite mass (mg/kg BW)

646

## 647 **References used for the meta-analysis**

648 Abrahamse PA, Tamminga S and Dijkstra J 2009. Effect of daily movement of dairy  
649 cattle to fresh grass in morning or afternoon on intake, grazing behaviour, rumen  
650 fermentation and milk production. *Journal of Agricultural Science* 147, 721-730.

651 Ackerman CJ, Purvis HT, Horn GW, Paisley SI, Reuter RR and Bodine TN 2001.  
652 Performance of light vs heavy steers grazing Plains Old World bluestem at three  
653 stocking rates. *Journal of Animal Science* 79, 493-499.

654 Amaral MF, Mezzalana JC, Bremm C, Da Trindade JK, Gibb MJ, Sune RWM and  
655 Carvalho PCD 2013. Sward structure management for a maximum short-term  
656 intake rate in annual ryegrass. *Grass and Forage Science* 68, 271-277.

657 Ayantunde AA, Fernandez-Rivera S, Hiernaux PH and Tabo R 2008. Implications  
658 of restricted access to grazing by cattle in wet season in the Sahel. *Journal of Arid*  
659 *Environments* 72, 523-533.

660 Ayantunde AA, Fernandez-Rivera S, Hiernaux PHY, Keulen Hv, Udo HMJ and  
661 Chanono M 2001. Effect of timing and duration of grazing of growing cattle in the  
662 West African Sahel on diet selection, faecal output, eating time, forage intake and  
663 live-weight changes. *Animal Science* 72, 117-128.

664 Barbieri CW, de Quadros FLF, Jochims F, Kuinchtner BC, de Carvalho THN,  
665 Casanova PT, Fernandes AM and Pereira JB 2015. Beef heifers grazing behavior  
666 and herbage intake in natural grassland under rotational grazing. *Ciencia Rural* 45,  
667 2056-2062.

668 Barrett PD, McGilloway DA, Laidlaw AS and Mayne CS 2003. The effect of sward  
669 structure as influenced by ryegrass genotype on bite dimensions and short-term  
670 intake rate by dairy cows. *Grass and Forage Science* 58, 2-11.

671 Benvenuti MA, Gordon IJ and Poppi DP 2006. The effect of the density and  
672 physical properties of grass stems on the foraging behaviour and instantaneous  
673 intake rate by cattle grazing an artificial reproductive tropical sward. *Grass and*  
674 *Forage Science* 61, 272-281.

675 Benvenuti MA, Gordon IJ and Poppi DP 2008. The effects of stem density of  
676 tropical swards and age of grazing cattle on their foraging behaviour. *Grass and*  
677 *Forage Science* 63, 1-8.

678 Benvenuti MA, Gordon IJ, Poppi DP, Crowther R, Spinks W and Moreno FC 2009.  
679 The horizontal barrier effect of stems on the foraging behaviour of cattle grazing  
680 five tropical grasses. *Livestock Science* 126, 229-238.

681 Black JL and Kenney PA 1984. Factors affecting diet selection by sheep .2. Height  
682 and density of pasture. *Australian Journal of Agricultural Research* 35, 565-578.

683 Bodine TN and Purvis HT, II 2003. Effects of supplemental energy and/or  
684 degradable intake protein on performance, grazing behavior, intake, digestibility,  
685 and fecal and blood indices by beef steers grazed on dormant native tallgrass  
686 prairie. In, pp. 304-317.

- 687 Boval M, Archimède H, Cruz P and Duru M 2007a. Intake and digestibility in a  
688 *Dichanthium* spp. dominated pasture, at 14 and 28 days of regrowth. *Animal Feed*  
689 *Science and Technology* 134, 18-31.
- 690 Boval M, Archimède H, Tournebise R and Coppry O 2002a. Stage of regrowth of  
691 tropical forage have various effect on diet quality of grazing heifers. In 19th General  
692 Meeting of European Grassland Federation, pp. 108-109. La Rochelle, France.
- 693 Boval M, Cruz P, Ledet JE, Coppry O and Archimède H 2002b. Effect of nitrogen  
694 on intake and digestibility of a tropical grass grazed by Creole heifers. *Journal of*  
695 *Agricultural Science* 138, 73-84.
- 696 Boval M, Cruz P, Peyraud JL and Penning P 2000. The effect of herbage allowance  
697 on daily intake by Creole heifers tethered on natural *Dichanthium* spp. pasture.  
698 *Grass and Forage Science* 55, 201-208.
- 699 Boval M, Fanchone A, Archimède H and Gibb MJ 2007b. Effect of structure of a  
700 tropical pasture on ingestive behaviour, digestibility of diet and daily intake by  
701 grazing cattle. *Grass and Forage Science* 62, 44-54.
- 702 Braghieri A, Pacelli C, Girolami A and Napolitano F 2011. Time budget, social and  
703 ingestive behaviours expressed by native beef cows in Mediterranean conditions.  
704 *Livestock Science* 141, 47-52.
- 705 Bratti LFS, Dittrich JR, Barros CS, Silva CJA, Monteiro ALG, Rocha CDR, Rocha  
706 FMPD 2009. Ingestive behavior of goats in ryegrass and black oat pastures in pure  
707 or mixture culture. *Ciência Animal Brasileira*, 10(2), 397-405.
- 708 Bremm C, Laca EA, Fonseca L, Mezzalana JC, Elejalde DAG, Gonda HL and  
709 Carvalho PCD 2012. Foraging behaviour of beef heifers and ewes in natural  
710 grasslands with distinct proportions of tussocks. *Applied Animal Behaviour Science*  
711 141, 108-116.
- 712 Brink GE and Soder KJ 2011. Relationship between Herbage Intake and Sward  
713 Structure of Grazed Temperate Grasses. *Crop Science* 51, 2289-2298.
- 714 Burlison AJ, Hodgson J and Illius AW 1991. Sward canopy structure and the bite  
715 dimensions and bite weight of grazing sheep. *Grass and Forage Science* 46, 29-  
716 38.
- 717 Cangiano CA, Galli JR, Pece MA, Dichio L and Rozsypalek SH 2002. Effect of  
718 liveweight and pasture height on cattle bite dimensions during progressive  
719 defoliation. *Australian Journal of Agricultural Research* 53, 541-549.
- 720 Casey IA, Laidlaw AS, Brereton AJ, McGilloway DA and Watson S 2004. The effect  
721 of bulk density on bite dimensions of cattle grazing microswards in the field. *Journal*  
722 *of Agricultural Science* 142, 109-121.
- 723 Chacon EA, Stobbs TH and Dale MB 1978. Influence of Sward Characteristics on  
724 Grazing Behavior and Growth of Hereford Steers Grazing Tropical Grass Pastures.  
725 *Australian Journal of Agricultural Research* 29, 89-102.
- 726 Charpentier A and Delagarde R 2018. Milk production and grazing behaviour  
727 responses of Alpine dairy goats to daily access time to pasture or to daily pasture  
728 allowance on temperate pastures in spring. *Small Ruminant Research* 162, 48-56.

- 729 Costa JV, Oliveira ME, Moura R, da Costa MDN and Rodrigues MM 2015. Grazing  
730 behavior and ingestive goats in silvopastoral system. *Revista Ciencia Agronomica*  
731 46, 865-872.
- 732 Da Trindade JK, Neves FP, Pinto CE, Bremm C, Mezzalira JC, Nadin LB, Genro  
733 TCM, Gonda HL and Carvalho PCF 2016. Daily Forage Intake by Cattle on Natural  
734 Grassland: Response to Forage Allowance and Sward Structure. *Rangeland*  
735 *Ecology & Management* 69, 59-67.
- 736 Da Trindade JK, Pinto CE, Neves FP, Mezzalira JC, Bremm C, Genro TCM,  
737 Tischler MR, Nabinger C, Gonda HL and Carvalho PCF 2012. Forage Allowance  
738 as a Target of Grazing Management: Implications on Grazing Time and Forage  
739 Searching. *Rangeland Ecology & Management* 65, 382-393.
- 740 de Macedo JDB, Teixeira FA, da Silva FF, Pires AJV, de Aguiar PB and  
741 Nascimento PVN 2016. Ingestive behavior of heifers on *Brachiaria* pasture deferred  
742 with different periods of sealing. *Semina-Ciencias Agrarias* 37, 4275-4284.
- 743 de Souza ANM, da Rocha MG, Potter L, Roso D, Glienke CL and Neto RAD 2011.  
744 Ingestive behavior of beef heifers in warm season annual grass pastures. *Revista*  
745 *Brasileira De Zootecnia-Brazilian Journal of Animal Science* 40, 1662-1670.
- 746 Dias DLS, Silva RR, Silva FFd, Carvalho GGPd, Barroso DS and Carvalho VM  
747 2014. Correlation between performance and ingestive behavior of steers post-  
748 weaned on pastures. *Acta Scientiarum. Animal Sciences* 36, 93-99.
- 749 Dohme-Meier F, Kaufmann LD, Gors S, Junghans P, Metges CC, van Dorland HA,  
750 Bruckmaier RM and Munger A 2014. Comparison of energy expenditure, eating  
751 pattern and physical activity of grazing and zero-grazing dairy cows at different time  
752 points during lactation. *Livestock Science* 162, 86-96.
- 753 Drescher M, Heitkonig IMA, Van den Brink PJ and Prins HHT 2006. Effects of sward  
754 structure on herbivore foraging behaviour in a South African savanna: An  
755 investigation of the forage maturation hypothesis. *Austral Ecology* 31, 76-87.
- 756 Dumont B, Garel JP, Ginane C, Decuq F, Farruggia A, Pradel P, Rigolot C and Petit  
757 M 2007. Effect of cattle grazing a species-rich mountain pasture under different  
758 stocking rates on the dynamics of diet selection and sward structure. *Animal* 1,  
759 1042-1052.
- 760 Fanchone A, Archimede H, Baumont R and Boval M 2010. Intake and digestibility  
761 of fresh grass fed to sheep indoors or at pasture, at two herbage allowances.  
762 *Animal Feed Science and Technology* 157, 151-158.
- 763 Fanchone A, Archimede H, Delagarde R and Boval M 2012. Comparison of intake  
764 and digestibility of fresh *Digitaria decumbens* grass fed to sheep, indoors or at  
765 pasture, at two different stages of regrowth. *Animal* 6, 1108-1114.
- 766 Fernandes M, Fernandes JS, De Resende KT, Bonfa HC, Reis RA, Ruggieri AC,  
767 Fernandes JJR and Santos PM 2016. Grazing behavior and intake of goats  
768 rotationally grazing Tanzania-grass pasture with different post-grazing residues.  
769 *Tropical Grasslands-Forrajes Tropicales* 4, 91-100.

- 770 Flores ER, Laca EA, Griggs TC and Demment MW 1993. Sward height and vertical  
771 morphological-differentiation determine cattle bite dimensions. *Agronomy Journal*  
772 85, 527-532.
- 773 Fonseca L, Carvalho PCF, Mezzalana JC, Bremm C, Galli JR and Gregorini P 2013.  
774 Effect of sward surface height and level of herbage depletion on bite features of  
775 cattle grazing *Sorghum bicolor* swards. *Journal of Animal Science* 91, 4357-4365.
- 776 Galli JR, Cangiano CA, Milone DH and Laca EA 2011. Acoustic monitoring of short-  
777 term ingestive behavior and intake in grazing sheep. *Livestock Science* 140, 32-41.
- 778 Galli JR, Cangiano CA, Pece MA, Larripa MJ, Milone DH, Utsumi SA and Laca EA  
779 2018. Monitoring and assessment of ingestive chewing sounds for prediction of  
780 herbage intake rate in grazing cattle. *Animal* 12, 973-982.
- 781 Gibb MJ, Huckle CA and Nuthall R 1998. Effect of time of day on grazing behaviour  
782 by lactating dairy cows. *Grass and Forage Science* 53, 41-46.
- 783 Gibb MJ, Huckle CA, Nuthall R and Rook AJ 1997. Effect of sward surface height  
784 on intake and grazing behaviour by lactating Holstein Friesian cows. *Grass and*  
785 *Forage Science* 52, 309-321.
- 786 Ginane C, Petit M and D'Hour P 2003. How do grazing heifers choose between  
787 maturing reproductive and tall or short vegetative swards? *Applied Animal*  
788 *Behaviour Science* 83, 15-27.
- 789 Glienke CL, Rocha MG, Potter L, Roso D, Montagner DB and Neto RAO 2016.  
790 Canopy structure, ingestive behavior and displacement patterns of beef heifers  
791 grazing warm-season pastures. *Arquivo Brasileiro De Medicina Veterinaria E*  
792 *Zootecnia* 68, 457-465.
- 793 Goncalves EN, Carvalho PCD, Kunrath TR, Carassai IJ, Bremm C and Fischer V  
794 2009. Plant-animal relationships in pastoral heterogeneous environment: process  
795 of herbage intake. *Revista Brasileira De Zootecnia-Brazilian Journal of Animal*  
796 *Science* 38, 1655-1662.
- 797 Goncalves EN, Carvalho PCD, Kunrath TR, Carassai IJ, Bremm C and Fischer V  
798 2009. Plant-animal relationships in pastoral heterogeneous environment: process  
799 of herbage intake. *Revista Brasileira De Zootecnia-Brazilian Journal of Animal*  
800 *Science* 38, 1655-1662.
- 801 Goncalves RP, Bremm C, Moojen FG, Marchi D, Zubricki G, Caetano LAM, Neto  
802 AB and Carvalho PCD 2018. Grazing down process: The implications of sheep's  
803 ingestive behavior for sward management. *Livestock Science* 214, 202-208.
- 804 Gordon IJ, Illius AW and Milne JD 1996. Sources of variation in the foraging  
805 efficiency of grazing ruminants. *Functional Ecology* 10, 219-226.
- 806 Gregorini P, Clark C, McLeod K, Glassey C, Romera A and Jago J 2011. Feeding  
807 station behavior of grazing dairy cows in response to restriction of time at pasture.  
808 *Livestock Science* 137, 287-291.
- 809 Gregorini P, Gunter SA, Beck PA, Caldwell J, Bowman MT and Coblenz WK 2009.  
810 Short-term foraging dynamics of cattle grazing swards with different canopy  
811 structures. *Journal of Animal Science* 87, 3817-3824.



- 812 Gregorini P, Gunter SA, Bowman MT, Caldwell JD, Masino CA, Coblenz WK and  
813 Beck PA 2011. Effect of herbage depletion on short-term foraging dynamics and  
814 diet quality of steers grazing wheat pastures. *Journal of Animal Science* 89, 3824-  
815 3830.
- 816 Griffiths WM, Hodgson J and Arnold GC 2003. The influence of sward canopy  
817 structure on foraging decisions by grazing cattle. I. Patch selection. *Grass and*  
818 *Forage Science* 58, 112-124.
- 819 Hampel VDS, da Rocha MG, Poetter L, Stivanin SCB, Alves MB, Cado LM, Neto  
820 LGD and Vicente JM 2016. Grazing behavior of non-supplemented and  
821 supplemented heifers on Italian ryegrass pasture. *Semina-Ciencias Agrarias* 37,  
822 2053-2065.
- 823 Hirata M, Matsumoto Y, Izumi S, Soga Y, Hirota F and Tobisa M 2015. Seasonal  
824 and interannual variations in feeding station behavior of cattle: effects of sward and  
825 meteorological conditions. *Animal* 9, 682-690.
- 826 Hirata M, Sakou A, Terayama Y, Furuya M and Nanba T 2008. Selection of feeding  
827 areas by cattle in a spatially heterogeneous environment: selection between two  
828 tropical grasses. *Journal of Ethology* 26, 327-338.
- 829 Hirata M, Yamamoto K and Tobisa M 2010. Selection of feeding areas by cattle in  
830 a spatially heterogeneous environment: selection between two tropical grasses  
831 differing in accessibility and abiotic environment. *Journal of Ethology* 28, 95-103.
- 832 Idibu J, Kabi F and Mpairwe D 2016. Behavioural response of pure Ankole and  
833 crossbred (Ankole x Holstein) cows to seasonal pasture variations in south-western  
834 Uganda. *Applied Animal Behaviour Science* 174, 11-18.
- 835 Illius AW, Gordon IJ, Milne JD and Wright W 1995. Costs and benefits of foraging  
836 on grasses varying in canopy structure and resistance to defoliation. *Functional*  
837 *Ecology* 9, 894-903.
- 838 Laca EA, Ungar ED and Demment MW 1994. Mechanisms of Handling Time and  
839 Intake Rate of a Large Mammalian Grazer. *Applied Animal Behaviour Science* 39,  
840 3-19.
- 841 Laca EA, Ungar ED, Seligman N and Demment MW 1992. Effects of sward height  
842 and bulk-density on bite dimensions of cattle grazing homogeneous swards. *Grass*  
843 *and Forage Science* 47, 91-102.
- 844 Lee C, Fisher AD, Colditz IG, Lea JM and Ferguson DM 2013. Preference of beef  
845 cattle for feedlot or pasture environments. *Applied Animal Behaviour Science* 145,  
846 53-59.
- 847 Mattiauda DA, Tamminga S, Gibb MJ, Soca P, Bentancur O and Chilibroste P 2013.  
848 Restricting access time at pasture and time of grazing allocation for Holstein dairy  
849 cows: Ingestive behaviour, dry matter intake and milk production. *Livestock*  
850 *Science* 152, 53-62.
- 851 McCarthy S, Horan B, Rath M, Linnane M, O'Connor P and Dillon P 2007. The  
852 influence of strain of Holstein-Friesian dairy cow and pasture-based feeding system  
853 on grazing behaviour, intake and milk production. *Grass and Forage Science* 62,  
854 13-26.

- 855 McGilloway DA, Cushnahan A, Laidlaw AS, Mayne CS and Kilpatrick DJ 1999. The  
856 relationship between level of sward height reduction in a rotationally grazed sward  
857 and short-term intake rates of dairy cows. *Grass and Forage Science* 54, 116-126.
- 858 Mendes FBL, Silva RR, de Carvalho GGP, da Silva FF, Lins T, da Silva ALN,  
859 Macedo V, Abreu G, de Souza SO and Guimaraes JO 2015. Ingestive behavior of  
860 grazing steers fed increasing levels of concentrate supplementation with different  
861 crude protein contents. *Tropical Animal Health and Production* 47, 423-428.
- 862 Mezzalira JC, Bonnet OJF, Carvalho PCD, Fonseca L, Bremm C, Mezzalira CC  
863 and Laca EA 2017. Mechanisms and implications of a type IV functional response  
864 for short-term intake rate of dry matter in large mammalian herbivores. *Journal of*  
865 *Animal Ecology* 86, 1159-1168.
- 866 Mezzalira JC, Carvalho PCD, Fonseca L, Bremm C, Cangiano C, Gonda HL and  
867 Laca EA 2014. Behavioural mechanisms of intake rate by heifers grazing swards  
868 of contrasting structures. *Applied Animal Behaviour Science* 153, 1-9.
- 869 Mitchell RJ, Hodgson J and Clark DA 1991. The effect of varying leafy sward height  
870 and bulk-density on the ingestive behavior of young deer and sheep. In  
871 *Proceedings of the New Zealand Society of Animal Production*, Vol 51 1991 (ed. A  
872 Parry), pp. 159-165.
- 873 Moterle PH, Rocha MG, Potter L, Sichonany MJO, Neto L, Silva MF, Salvador PR  
874 and Vicente JM 2017. Displacement patterns of beef heifers receiving supplement  
875 in Italian ryegrass pasture. *Arquivo Brasileiro De Medicina Veterinaria E Zootecnia*  
876 69, 1021-1029.
- 877 Neto RAD, da Silva JHS, da Rocha MG, Potter L, Sichonany MJD, Biscaino LL,  
878 dos Santos FA and Difante MVB 2013. Ingestive behavior, performance and forage  
879 intake by beef heifers on tropical pasture systems. *Revista Brasileira De Zootecnia-*  
880 *Brazilian Journal of Animal Science* 42, 549-558.
- 881 Orr DM, Burrows WH, Hendricksen RE, Clem RL, Rutherford MT, Conway MJ,  
882 Myles DJ, Back PV and Paton CJ 2001. Pasture yield and composition changes in  
883 a Central Queensland black speargrass (*Heteropogon contortus*) pasture in relation  
884 to grazing management options. *Australian Journal of Experimental Agriculture* 41,  
885 477-485.
- 886 Orr RJ, Young KL, Cook JE and Champion RA 2005. Development of a micro-  
887 sward technique for determining intake characteristics of perennial ryegrass  
888 varieties. *Euphytica* 141, 65-73.
- 889 Oudshoorn FW, Cornou C, Hellwing ALF, Hansen HH, Munksgaard L, Lund P and  
890 Kristensen T 2013. Estimation of grass intake on pasture for dairy cows using tightly  
891 and loosely mounted di- and tri-axial accelerometers combined with bite count.  
892 *Computers and Electronics in Agriculture* 99, 227-235.
- 893 Palhano AL, Carvalho PCD, Dittrich JR, de Moraes A, da Silva SC and Monteiro  
894 ALG 2007. Forage intake characteristics on mombacagrass pastures grazed by  
895 Holstein heifers. *Revista Brasileira De Zootecnia-Brazilian Journal of Animal*  
896 *Science* 36, 1014-1021.

- 897 Penning P and Boval M 1997. Effects of fasting on ingestive behaviour of sheep  
898 grazing grass or white clover monocultures. In XVIIIth International Grassland  
899 Congress, Manitoba, Saskatchewan, Canada,
- 900 Pizzuti LAD, Alves DC, Brondani IL, Pacheco PS, Freitas LD, Segabinazzi LR,  
901 Callegaro AM and Teixeira OD 2012. Behavior pattern of beef heifers  
902 supplemented with different energy sources on oat and ryegrass pasture. Revista  
903 Brasileira De Zootecnia-Brazilian Journal of Animal Science 41, 1921-1927.
- 904 Rocha CH, Santos GT, Padilha DA, Schmitt D, Medeiros-Neto C and Sbrissia AF  
905 2016. Displacement patterns of cattle grazing on Kikuyugrass swards under  
906 intermittent grazing. Arquivo Brasileiro De Medicina Veterinaria E Zootecnia 68,  
907 1647-1654.
- 908 Roguet C, Prache S and Petit M 1998. Feeding station behaviour of ewes in  
909 response to forage availability and sward phenological stage. Applied Animal  
910 Behaviour Science 56, 187-201.
- 911 Rook AJ, Dumont B, Isselstein J, Osoro K, WallisDeVries MF, Parente G and Mills  
912 J 2004. Matching type of livestock to desired biodiversity outcomes in pastures - a  
913 review. Biological Conservation 119, 137-150.
- 914 Rutter SM, Orr RJ, Penning PD, Yarrow NH and Champion RA 2002. Ingestive  
915 behaviour of heifers grazing monocultures of ryegrass or white clover. Applied  
916 Animal Behaviour Science 76, 1-9.
- 917 Sichonany MJD, da Rocha MG, Potter L, da Rosa ATN, de Oliveria A, Ribeiro LA,  
918 Stivanin SCB and Alves MB 2017. Effect of supplementation frequency in feeding  
919 behavior, displacement patterns and forage intake of beef heifers. Semina-Ciencias  
920 Agrarias 38, 3215-3229.
- 921 Soca P, Gonzalez H, Manterola H, Bruni M, Mattiauda D, Chilibroste P and  
922 Gregorini P 2014. Effect of restricting time at pasture and concentrate  
923 supplementation on herbage intake, grazing behaviour and performance of  
924 lactating dairy cows. Livestock Science 170, 35-42.
- 925 Soder KJ, Gregorini P, Scaglia G and Rook AJ 2009. Dietary Selection by Domestic  
926 Grazing Ruminants in Temperate Pastures: Current State of Knowledge,  
927 Methodologies, and Future Direction. Rangeland Ecology & Management 62, 389-  
928 398.
- 929 Sprinkle JE, Holloway JW, Warrington BG, Ellis WC, Stuth JW, Forbes TDA and  
930 Greene LW 2000. Digesta kinetics, energy intake, grazing behavior, and body  
931 temperature of grazing beef cattle differing in adaptation to heat. Journal of Animal  
932 Science 78, 1608-1624.
- 933 Stakelum G and Dillon P 2004. The effect of herbage mass and allowance on  
934 herbage intake, diet composition and ingestive behaviour of dairy cows. Irish  
935 Journal of Agricultural and Food Research 43, 17-30.
- 936 Taweel HZ, Tas BM, Smit HJ, Tamminga S and Elgersma A 2006. A note on eating  
937 behaviour of dairy cows at different stocking systems- diurnal rhythm and effects of  
938 ambient temperature. Applied Animal Behaviour Science 98, 315-322.



- 939 Teixeira FA, Bonomo P, Pires AJV, da Silva FF, Marques JD and de Santana HA  
940 2011. Displacement and permanency patterns of grazing cattle on *Brachiaria*  
941 *decumbens* deferred under four fertilization strategies. *Revista Brasileira De*  
942 *Zootecnia-Brazilian Journal of Animal Science* 40, 1489-1496.
- 943 Thanner S, Dohme-Meier F, Gors S, Metges CC, Bruckmaier RM and Schori F  
944 2014. The energy expenditure of 2 Holstein cow strains in an organic grazing  
945 system. *Journal of Dairy Science* 97, 2789-2799.
- 946 Tharmaraj J, Wales WJ, Chapman DF and Egan AR 2003. Defoliation pattern,  
947 foraging behaviour and diet selection by lactating dairy cows in response to sward  
948 height and herbage allowance of a ryegrass-dominated pasture. *Grass and Forage*  
949 *Science* 58, 225-238.
- 950 Ungar ED and Griffiths WM 2002. The imprints created by cattle grazing short  
951 sequences of bites on continuous alfalfa swards. *Applied Animal Behaviour*  
952 *Science* 77, 1-12.
- 953 Ungar ED, Ravid N and Bruckental I 2001. Bite dimensions for cattle grazing  
954 herbage at low levels of depletion. *Grass and Forage Science* 56, 35-45.
- 955 Ungar ED, Ravid N, Zada T, Ben-Moshe E, Yonatan R, Baram H and Genizi A  
956 2006. The implications of compound chew-bite jaw movements for bite rate in  
957 grazing cattle. *Applied Animal Behaviour Science* 98, 183-195.
- 958 Utsumi SA, Cangiano CA, Galli JR, McEachern MB, Demment MW and Laca EA  
959 2009. Resource heterogeneity and foraging behaviour of cattle across spatial  
960 scales. *BMC Ecology* 9, 9.
- 961 Vilela HH, de Lana Sousa BM, Rozalino Santos ME, Santos AL, de Assis CZ,  
962 Rocha GdO, Faria BD and do Nascimento Junior D 2012. Forage mass and  
963 structure of piata grass deferred at different heights and variable periods. *Revista*  
964 *Brasileira De Zootecnia-Brazilian Journal of Animal Science* 41, 1625-1631.
- 965 WallisDeVries MF, Laca EA and Demment MW 1999. The importance of scale of  
966 patchiness for selectivity in grazing herbivores. *Oecologia* 121, 355-363.
- 967 Yayota M, Kato A, Ishida M and Ohtani S 2015. Ingestive behavior and short-term  
968 intake rate of cattle grazing on tall grasses. *Livestock Science* 180, 113-120.
- 969
